# Supplementary material
Source: PubMed Central journal article supplement (PMC6689942)
Supplement: pnas.1815678116.sapp.pdf [file pnas.1815678116.sapp.pdf]

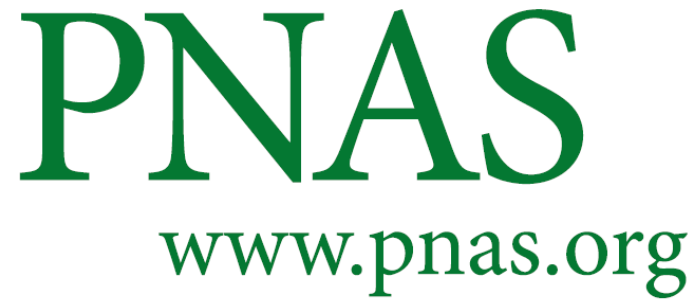

## Supplementary Information for

Effects of Policy-Driven Hypothetical Air Pollutant Interventions on  
Childhood Asthma Incidence in Southern California

Erika Garcia, Robert Urman, Kiros Berhane, Rob McConnell, Frank Gilliland

Erika Garcia  
Email: [garc991@usc.edu](mailto:garc991@usc.edu)

### **This PDF file includes:**

Figs. S1  
Tables S1 to S4

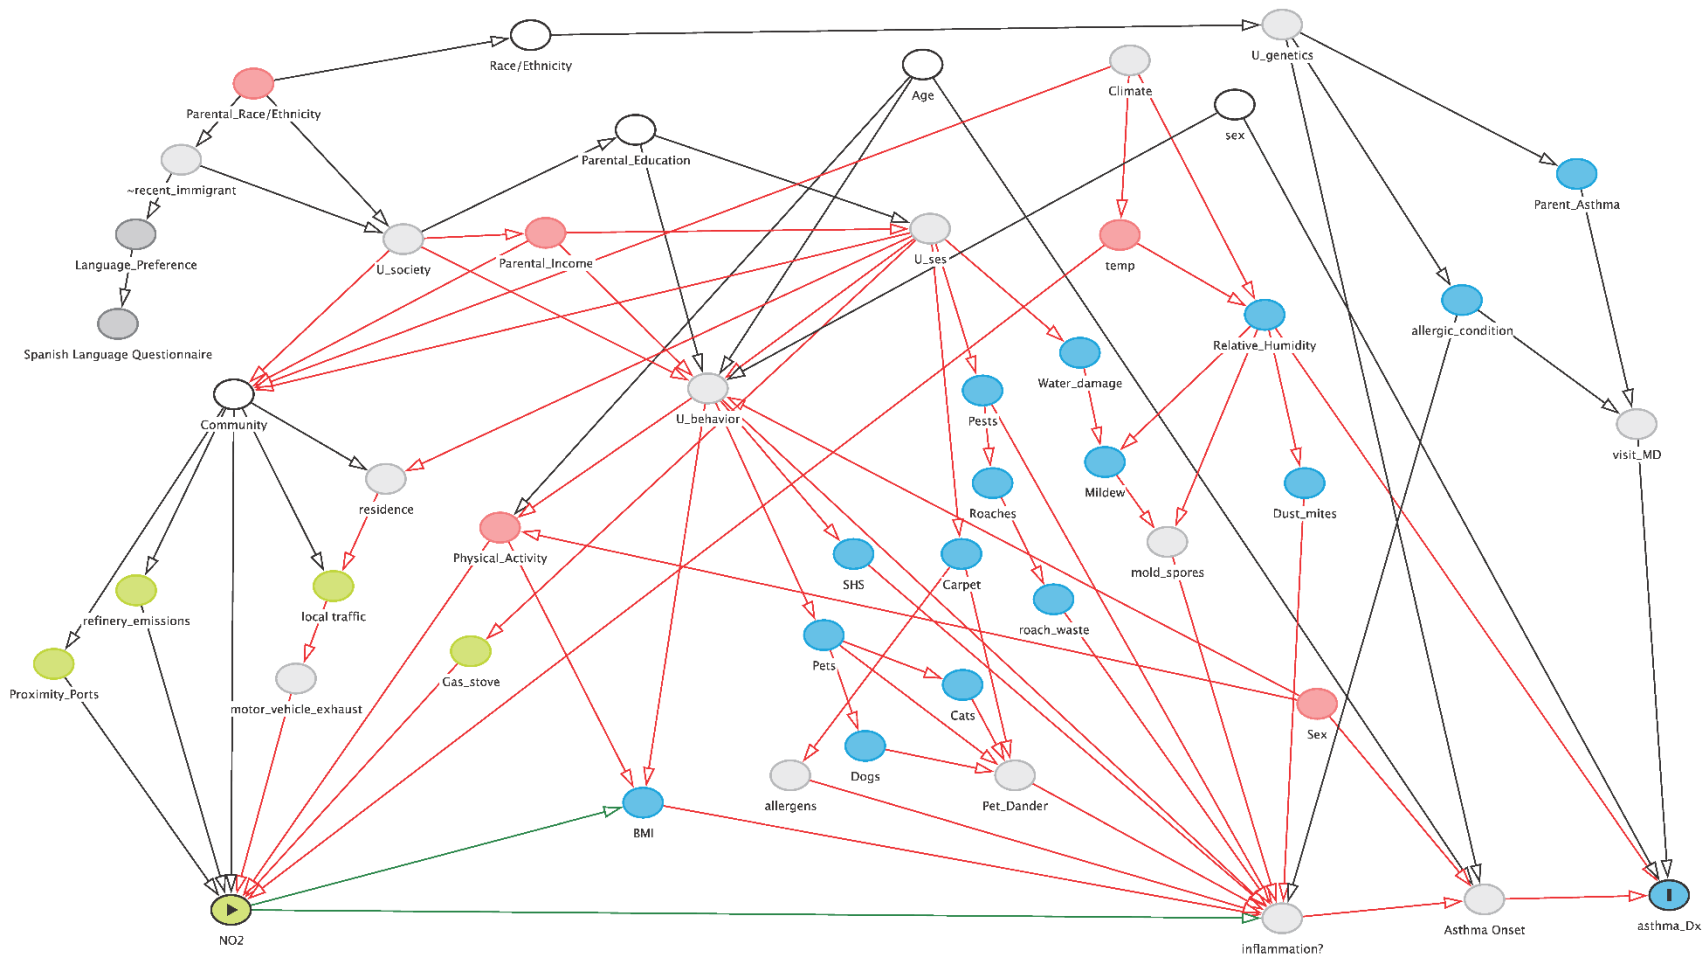

**Fig. S1.** Directed acyclic graph used in our a priori assessment of confounding.

**Table S1. Distribution of selected characteristics in the CHS study population.**

| <b>Characteristic</b>                   | <b>All Participants,<br/>N (%)</b> | <b>Cohort Follow-up Period, N (%)</b> |                  |                  |
|-----------------------------------------|------------------------------------|---------------------------------------|------------------|------------------|
|                                         |                                    | <b>1993-2001</b>                      | <b>1996-2004</b> | <b>2006-2014</b> |
| Subjects                                | 4140                               | 1093                                  | 1170             | 1877             |
| Person-years of follow-up               | 24254                              | 6201                                  | 6842             | 11211            |
| Incident asthma cases                   | 525                                | 139                                   | 184              | 202              |
| Age at study entry, mean (SD),<br>years | 9.5 (0.6)                          | 9.9 (0.5)                             | 9.5 (0.4)        | 9.3 (0.7)        |
| Sex                                     |                                    |                                       |                  |                  |
| Female                                  | 2179 (52.6)                        | 569 (52.1)                            | 606 (51.8)       | 1004 (53.5)      |
| Male                                    | 1961 (47.4)                        | 524 (47.9)                            | 564 (48.2)       | 873 (46.5)       |
| Ethnicity                               |                                    |                                       |                  |                  |
| Non-Hispanic                            | 2310 (57.8)                        | 776 (71.7)                            | 750 (64.5)       | 784 (44.8)       |
| Hispanic                                | 1686 (42.2)                        | 307 (28.4)                            | 413 (35.5)       | 966 (55.2)       |
| Race                                    |                                    |                                       |                  |                  |
| White                                   | 2273 (58.6)                        | 704 (65.7)                            | 692 (59.8)       | 877 (53.2)       |
| Native American Indian/Other            | 890 (23)                           | 182 (17)                              | 249 (21.5)       | 459 (27.8)       |
| Mixed                                   | 392 (10.1)                         | 76 (7.1)                              | 106 (9.2)        | 210 (12.7)       |
| Asian/Pacific Islander                  | 178 (4.6)                          | 60 (5.6)                              | 56 (4.8)         | 62 (3.8)         |
| Black                                   | 145 (3.7)                          | 50 (4.7)                              | 54 (4.7)         | 41 (2.5)         |
| Parental education                      |                                    |                                       |                  |                  |
| Some college or above                   | 2476 (63.5)                        | 689 (64.5)                            | 728 (65.4)       | 1059 (61.6)      |
| High school graduate or below           | 1424 (36.5)                        | 379 (35.5)                            | 385 (34.6)       | 660 (38.4)       |
| Gas stove in home                       |                                    |                                       |                  |                  |
| Yes                                     | 3153 (80.1)                        | 824 (77.2)                            | 860 (75)         | 1469 (85.3)      |
| No                                      | 784 (19.9)                         | 243 (22.8)                            | 287 (25)         | 254 (14.7)       |
| Participation in team sports            |                                    |                                       |                  |                  |
| Yes                                     | 2104 (52.1)                        | 542 (50.5)                            | 597 (52.6)       | 965 (52.7)       |
| No                                      | 1938 (48)                          | 532 (49.5)                            | 539 (47.5)       | 867 (47.3)       |

**Table S2. Exposure distribution under natural course of exposure and hypothetical air pollutant interventions.**

|                                            | Pollutant concentration<br>[mean (range)] | Affected by intervention (N) |                     |
|--------------------------------------------|-------------------------------------------|------------------------------|---------------------|
|                                            |                                           | Participants                 | Cohort- communities |
| <b>NO<sub>2</sub> (ppb)</b>                |                                           |                              |                     |
| Natural course                             | 20.4 (7.2-41.7)                           | -                            | -                   |
| Remain at 1993 levels                      | 23.7 (8.0-41.7)                           | 3047                         | 18                  |
| Percent Reduction                          |                                           |                              |                     |
| 10%                                        | 18.3 (6.5-37.5)                           | 4140                         | 27                  |
| 20%                                        | 16.3 (5.8-33.4)                           | 4140                         | 27                  |
| 30%                                        | 14.3 (5.0-29.2)                           | 4140                         | 27                  |
| Hypothetical Standards                     |                                           |                              |                     |
| 30 ppb                                     | 19.1 (7.2-30.0)                           | 976                          | 7                   |
| 20 ppb                                     | 16.1 (7.2-20.0)                           | 1774                         | 12                  |
| 10 ppb                                     | 9.6 (7.2-10.0)                            | 3192                         | 22                  |
| <b>PM<sub>2.5</sub> (µg/m<sup>3</sup>)</b> |                                           |                              |                     |
| Natural course                             | 17.4 (7.1-32.9)                           | -                            | -                   |
| Remain at 1993 levels                      | 20.9 (8.9-32.9)                           | 3047                         | 18                  |
| Percent Reduction                          |                                           |                              |                     |
| 10%                                        | 15.6 (6.4-29.6)                           | 4140                         | 27                  |
| 20%                                        | 13.9 (5.7-26.3)                           | 4140                         | 27                  |
| 30%                                        | 12.2 (5.0-23.0)                           | 4140                         | 27                  |
| Hypothetical Standards                     |                                           |                              |                     |
| 15 µg/m <sup>3</sup>                       | 12.7 (7.1-15.0)                           | 2236                         | 15                  |
| 12 µg/m <sup>3</sup>                       | 10.9 (7.1-12.0)                           | 2520                         | 17                  |
| 10 µg/m <sup>3</sup>                       | 9.6 (7.1-10.0)                            | 3128                         | 21                  |

**Table S3. Exponentiated parameter coefficients from main air pollution models and from sensitivity analyses models.**

|                                                             | <b>NO<sub>2</sub> Models</b>            |                | <b>PM<sub>2.5</sub> Models</b>          |                |
|-------------------------------------------------------------|-----------------------------------------|----------------|-----------------------------------------|----------------|
|                                                             | <b>exp(<math>\beta</math>) (95% CI)</b> | <b>P-value</b> | <b>exp(<math>\beta</math>) (95% CI)</b> | <b>P-value</b> |
| Main Model                                                  | 1.053 (1.024-1.082)                     | 0.0003         | 1.026 (1.002-1.051)                     | 0.03           |
| <i>Restricted to longer follow-up</i>                       |                                         |                |                                         |                |
| Followed until event or year 7 or later                     | 1.049 (1.020-1.078)                     | 0.0008         | 1.027 (1.002-1.052)                     | 0.03           |
| Followed until event or year 5 or later                     | 1.053 (1.024-1.082)                     | 0.0003         | 1.028 (1.003-1.053)                     | 0.03           |
| <i>Additionally adjusted for:</i>                           |                                         |                |                                         |                |
| Income, education, and insurance                            | 1.056 (1.027-1.086)                     | 0.0001         | 1.028 (1.003-1.054)                     | 0.03           |
| Exposure to smoking in utero, and secondhand smoke exposure | 1.053 (1.024-1.082)                     | 0.0002         | 1.027 (1.002-1.052)                     | 0.03           |
| Pests in home, pets in home, and carpet in child's bedroom  | 1.051 (1.023-1.081)                     | 0.0004         | 1.024 (1.000-1.050)                     | 0.05           |
| Main model with time-varying exposure                       | 1.033 (1.014-1.053)                     | 0.0007         | 1.023 (1.001-1.045)                     | 0.04           |

All models fitted using Poisson regression except for model with time-varying exposure which was fitted using Cox proportional hazards regression without a random effect.

Models adjusted for community as a fixed effect, age at baseline, sex, ethnicity, race, gas stove in home, participation in sports, and community-level average temperature for baseline year.

**Table S4. P-values for interaction term between air pollution exposure and several covariates.**

| <b>Covariate</b>                  | <b>Pollutant</b>      |                         |
|-----------------------------------|-----------------------|-------------------------|
|                                   | <b>NO<sub>2</sub></b> | <b>PM<sub>2.5</sub></b> |
| Sex                               | 0.53                  | 0.20                    |
| Ethnicity                         | 0.41                  | 0.82                    |
| Race                              | 0.46                  | 0.22                    |
| In utero exposure to smoking      | 0.13                  | 0.74                    |
| Secondhand smoke exposure         | 0.62                  | 0.13                    |
| Parental education                | 0.60                  | 0.87                    |
| Parental history of asthma        | 0.86                  | 0.78                    |
| High/low 1993 air pollution level | 0.80                  | 0.07                    |
